# Supplementary material
Source: Springer Nature journal article supplement (https://www.springermedizin.de/resource/supplementary/12936_2012_2502_MOESM3_ESM.pdf/9543128)
Supplement: MOESM3 [file 9543128]

| Competency Level        | Species Identification | Parasite Quantitation              |
|-------------------------|------------------------|------------------------------------|
|                         | (Accuracy)             | (within 25% of true count)         |
|                         | All slides             | 15 slides of quantitation set only |
| <b>Level 1 (Expert)</b> | $\geq 90\%$            | $\geq 50\%$                        |
| <b>Level 2</b>          | $\geq 70\%$            | $\geq 30\%$                        |
| <b>Level 3</b>          | $<70\%$                | $\geq 40\%$                        |
| <b>Level 4</b>          | $<30\%$                | $\geq 80\%$                        |
